# Supplementary material
Source: PubMed Central journal article supplement (PMC3486619)
Supplement: AAC.00789-12_zac999101359so1.pdf [file AAC.00789-12_zac999101359so1.pdf]

TABLE S1. *rpoB* primer sequences for 454-pyrosequencing of bifidobacteria populations

| <b>Name</b> | <b>Amplicon A adaptor</b> | <b>Barcode</b> | <b>Oligosequence</b> |
|-------------|---------------------------|----------------|----------------------|
| BC1         | CGTATCGCCTCCCTCGCGCCATCAG | AGAGAGAG       | TCGATCGGGCACATACGG   |
| BC2         | CGTATCGCCTCCCTCGCGCCATCAG | AGAGATGC       | TCGATCGGGCACATACGG   |
| BC3         | CGTATCGCCTCCCTCGCGCCATCAG | AGAGCAGC       | TCGATCGGGCACATACGG   |
| BC4         | CGTATCGCCTCCCTCGCGCCATCAG | AGAGCATG       | TCGATCGGGCACATACGG   |
| BC5         | CGTATCGCCTCCCTCGCGCCATCAG | AGATCATC       | TCGATCGGGCACATACGG   |
| BC6         | CGTATCGCCTCCCTCGCGCCATCAG | AGATCTGC       | TCGATCGGGCACATACGG   |
| BC7         | CGTATCGCCTCCCTCGCGCCATCAG | AGATGAGC       | TCGATCGGGCACATACGG   |
| BC8         | CGTATCGCCTCCCTCGCGCCATCAG | AGATGATG       | TCGATCGGGCACATACGG   |
| BC9         | CGTATCGCCTCCCTCGCGCCATCAG | AGATGCAG       | TCGATCGGGCACATAGG    |
| BC10        | CGTATCGCCTCCCTCGCGCCATCAG | AGATGCTC       | TCGATCGGGCACATACGG   |
| BC11        | CGTATCGCCTCCCTCGCGCCATCAG | AGCAGAGC       | TCGATCGGGCACATACGG   |
| BC12        | CGTATCGCCTCCCTCGCGCCATCAG | AGCAGATG       | TCGATCGGGCACATACGG   |
| Rev 1       | CTATGCGCCTTGCCAGCCCGCTCAG | None           | CGACCACTTCGGCAACCG   |

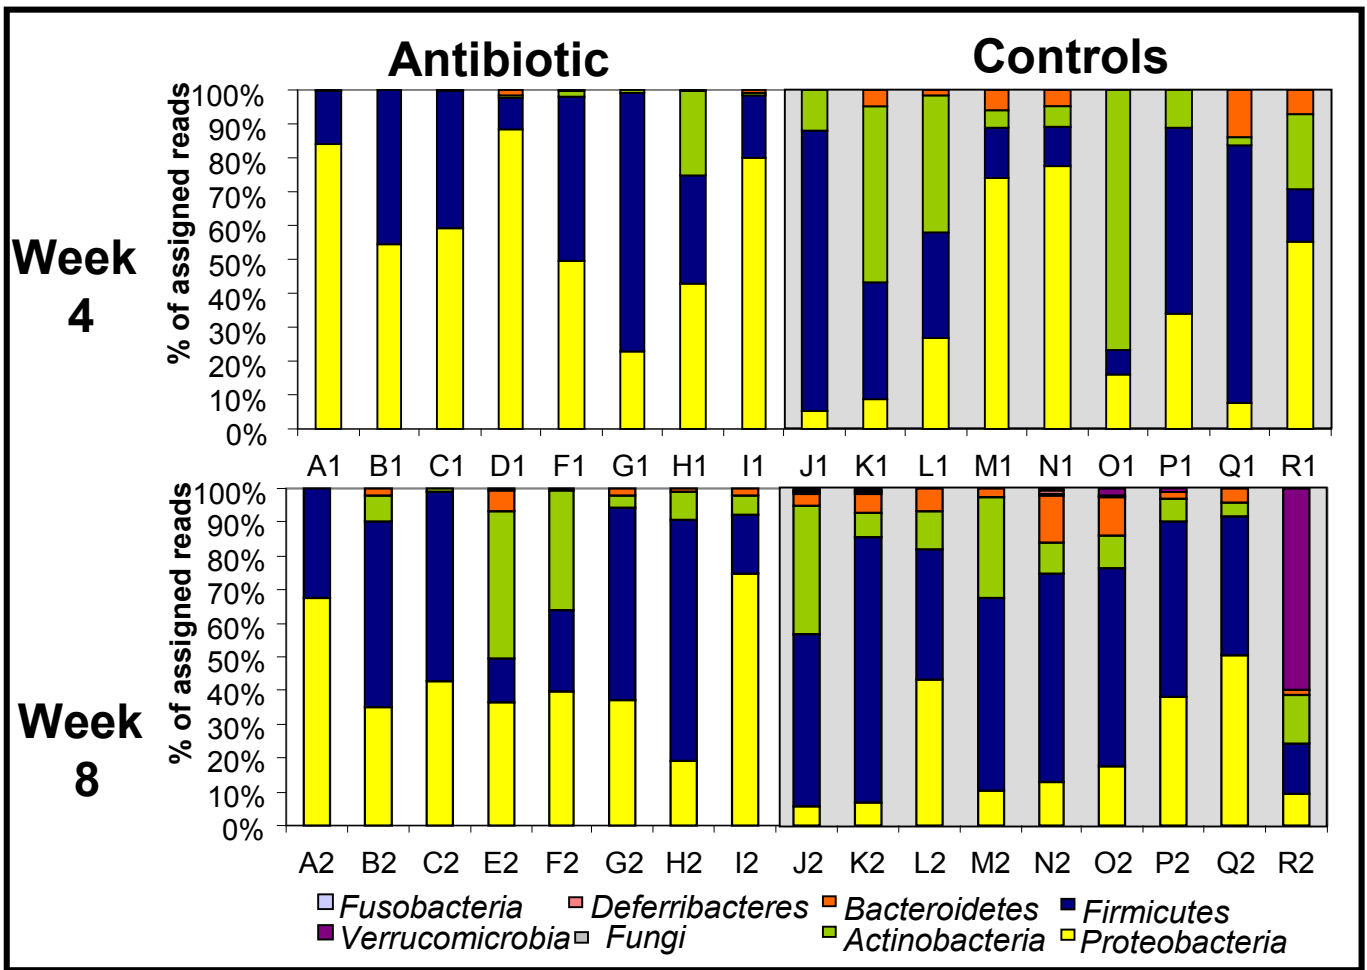

FIG. S1. Distribution of microbiota at phylum level in the antibiotic treated (A1-I1) and control infants (J1-R1) at week 4 and week 8, showing the limited number of phyla detected in the antibiotic treated infants compared to the controls and also showing the individual variability that exists between samples, particularly in the controls.
